# Supplementary material
Source: PubMed Central journal article supplement (PMC3656588)
Supplement: NIHMS459091-supplement-01.pdf [file NIHMS459091-supplement-01.pdf]

**Table S1. *S. cerevisiae* Strains Tested as Part of This Work, Related to Figure 2**

This table describes the single-deletion yeast strains tested as part of this work. The first 56 strains were tested in a high-throughput 96-well format (Supplemental Experimental Procedures). The three right-most columns refer to results from the colony forming assays conducted in 24-well plates and described in the main text. "Resistant" or "Sensitive" indicate at least a 5-fold CFU difference from wildtype at the final time point.

| Strain Name | Gene   | 96 Well Screen AMB | 96 Well Screen MCZ | CFU AMB    | CFU CIC    | CFU MCZ    |
|-------------|--------|--------------------|--------------------|------------|------------|------------|
| PAB101      | WT     | Normal             | Normal             | Normal     | Not Tested | Not Tested |
| PAB102      | HSP104 | Resistant          | Normal             | Normal     | Not Tested | Not Tested |
| PAB103      | SDH2   | Resistant          | Resistant          | Resistant  | Resistant  | Resistant  |
| PAB104      | FRE8   | Resistant          | Normal             | Resistant  | Not Tested | Not Tested |
| PAB105      | CHA4   | Resistant          | Normal             | Resistant  | Not Tested | Not Tested |
| PAB106      | FMS1   | Resistant          | Normal             | Resistant  | Normal     | Not Tested |
| PAB107      | NDE1   | Resistant          | Resistant          | Resistant  | Resistant  | Resistant  |
| PAB108      | ALD3   | Resistant          | Normal             | Normal     | Not Tested | Not Tested |
| PAB109      | GAD1   | Normal             | Normal             | Not Tested | Not Tested | Not Tested |
| PAB110      | PGM3   | Normal             | Normal             | Not Tested | Not Tested | Not Tested |
| PAB111      | PYK2   | Resistant          | Resistant          | Not Tested | Not Tested | Not Tested |
| PAB112      | MNE1   | Normal             | Normal             | Resistant  | Resistant  | Resistant  |
| PAB113      | FUM1   | Normal             | Resistant          | Resistant  | Resistant  | Resistant  |
| PAB114      | TPK2   | Normal             | Normal             | Resistant  | Normal     | Resistant  |
| PAB115      | ATG29  | Resistant          | Normal             | Not Tested | Not Tested | Not Tested |
| PAB116      | ISU1   | Resistant          | Normal             | Normal     | Not Tested | Not Tested |
| PAB117      | CYC7   | Normal             | Normal             | Normal     | Not Tested | Not Tested |
| PAB118      | ARN1   | Normal             | Normal             | Not Tested | Not Tested | Not Tested |
| PAB119      | CIT2   | Resistant          | Resistant          | Resistant  | Resistant  | Resistant  |
| PAB120      | HSP30  | Normal             | Resistant          | Normal     | Not Tested | Not Tested |
| PAB121      | SDH1   | Normal             | Resistant          | Resistant  | Resistant  | Resistant  |
| PAB122      | TPK3   | Resistant          | Resistant          | Resistant  | Resistant  | Resistant  |
| PAB123      | ISU2   | Normal             | Normal             | Normal     | Not Tested | Not Tested |
| PAB124      | TPK1   | Normal             | Normal             | Resistant  | Resistant  | Resistant  |
| PAB125      | MID2   | Normal             | Normal             | Not Tested | Not Tested | Not Tested |
| PAB126      | SSK1   | Sensitive          | Normal             | Not Tested | Not Tested | Not Tested |
| PAB127      | HSP42  | Normal             | Normal             | Not Tested | Not Tested | Not Tested |
| PAB128      | PIG1   | Normal             | Normal             | Not Tested | Not Tested | Not Tested |
| PAB129      | ACO1   | Poor Growth        | Poor Growth        | Not Tested | Not Tested | Not Tested |

| Strain Name | Gene   | 96 Well Screen AMB | 96 Well Screen MCZ | CFU AMB    | CFU CIC    | CFU MCZ    |
|-------------|--------|--------------------|--------------------|------------|------------|------------|
| PAB130      | UGA1   | Resistant          | Normal             | Not Tested | Not Tested | Not Tested |
| PAB131      | MTL1   | Normal             | Normal             | Not Tested | Not Tested | Not Tested |
| PAB132      | CIT3   | Resistant          | Resistant          | Resistant  | Resistant  | Resistant  |
| PAB133      | ZWF1   | Normal             | Normal             | Not Tested | Not Tested | Not Tested |
| PAB134      | SUM1   | sensitive          | Normal             | Not Tested | Not Tested | Not Tested |
| PAB135      | NDI1   | Resistant          | Normal             | Resistant  | Resistant  | Resistant  |
| PAB136      | PGM2   | Normal             | Resistant          | Not Tested | Not Tested | Not Tested |
| PAB137      | HFD1   | Normal             | Normal             | Not Tested | Not Tested | Not Tested |
| PAB138      | PUF2   | Normal             | Normal             | Not Tested | Not Tested | Not Tested |
| PAB139      | TDH1   | Sensitive          | Normal             | Not Tested | Not Tested | Not Tested |
| PAB140      | GUD1   | Sensitive          | Sensitive          | Not Tested | Not Tested | Not Tested |
| PAB141      | ATG15  | Sensitive          | Normal             | Not Tested | Not Tested | Not Tested |
| PAB142      | TDH2   | Sensitive          | Normal             | Not Tested | Not Tested | Not Tested |
| PAB143      | ATP1   | Sensitive          | Normal             | Not Tested | Not Tested | Not Tested |
| PAB144      | UGA2   | Sensitive          | Normal             | Not Tested | Not Tested | Not Tested |
| PAB145      | CIT1   | Resistant          | Resistant          | Resistant  | Resistant  | Resistant  |
| PAB146      | SOL1   | Normal             | Normal             | Not Tested | Not Tested | Not Tested |
| PAB147      | PAN6   | Normal             | Normal             | Not Tested | Not Tested | Not Tested |
| PAB148      | SOL4   | Normal             | Normal             | Not Tested | Not Tested | Not Tested |
| PAB149      | YAK1   | Sensitive          | Sensitive          | Sensitive  | Not Tested | Not Tested |
| PAB150      | PBS2   | Sensitive          | Sensitive          | Not Tested | Not Tested | Not Tested |
| PAB152      | GPD1   | Sensitive          | Sensitive          | Not Tested | Not Tested | Not Tested |
| PAB153      | SHO1   | Sensitive          | Sensitive          | Sensitive  | Not Tested | Not Tested |
| PAB154      | FET3   | Sensitive          | Sensitive          | Not Tested | Not Tested | Not Tested |
| PAB155      | FBP1   | Sensitive          | Sensitive          | Sensitive  | Not Tested | Not Tested |
| PAB156      | COX6   | Sensitive          | Sensitive          | Not Tested | Not Tested | Not Tested |
| PAB157      | SKN7   | Not Tested         | Not Tested         | Not Tested | Not Tested | Not Tested |
| PAB158      | MSN4   | Not Tested         | Not Tested         | Normal     | Not Tested | Not Tested |
| PAB159      | SSK1   | Not Tested         | Not Tested         | Not Tested | Not Tested | Not Tested |
| PAB161      | MSN2   | Not Tested         | Not Tested         | Normal     | Not Tested | Not Tested |
| PAB162      | YAP1   | Not Tested         | Not Tested         | Normal     | Not Tested | Not Tested |
| PAB163      | CIN5   | Not Tested         | Not Tested         | Normal     | Not Tested | Not Tested |
| PAB164      | Pde2   | Not Tested         | Not Tested         | Normal     | Not Tested | Not Tested |
| PAB165      | USV1   | Not Tested         | Not Tested         | Normal     | Not Tested | Not Tested |
| PAB166      | CAD1   | Not Tested         | Not Tested         | Normal     | Not Tested | Not Tested |
| PAB167      | RIM101 | Not Tested         | Not Tested         | Normal     | Not Tested | Not Tested |
| PAB168      | RAS1   | Not Tested         | Not Tested         | Resistant  | Resistant  | Resistant  |
| PAB169      | HYR1   | Not Tested         | Not Tested         | Resistant  | Not Tested | Not Tested |
| PAB170      | CRZ1   | Not Tested         | Not Tested         | Normal     | Not Tested | Not Tested |
| PAB171      | RAS2   | Not Tested         | Not Tested         | Resistant  | Resistant  | Resistant  |
| PAB172      | XBP1   | Not Tested         | Not Tested         | Normal     | Not Tested | Not Tested |

---

| Strain Name | Gene  | 96 Well Screen AMB | 96 Well Screen MCZ | CFU AMB    | CFU CIC    | CFU MCZ    |
|-------------|-------|--------------------|--------------------|------------|------------|------------|
| PAB173      | SRV2  | Not Tested         | Not Tested         | Normal     | Not Tested | Not Tested |
| PAB174      | TPS3  | Not Tested         | Not Tested         | Resistant  | Not Tested | Not Tested |
| PAB175      | TPS2  | Poor Growth        | Poor Growth        | Sensitive  | Not Tested | Not Tested |
| PAB176      | SOD1  | Poor Growth        | Poor Growth        | Not Tested | Not Tested | Not Tested |
| PAB177      | SOD2  | Not Tested         | Not Tested         | Normal     | Not Tested | Not Tested |
| PAB178      | CTA1  | Not Tested         | Not Tested         | Normal     | Not Tested | Not Tested |
| PAB179      | CTT1  | Not Tested         | Not Tested         | Normal     | Not Tested | Not Tested |
| PAB180      | MET1  | Not Tested         | Not Tested         | Normal     | Not Tested | Not Tested |
| PAB181      | TVP18 | Not Tested         | Not Tested         | Normal     | Not Tested | Not Tested |
| PAB182      | PML39 | Not Tested         | Not Tested         | Normal     | Not Tested | Not Tested |
| PAB183      | VPS9  | Not Tested         | Not Tested         | Normal     | Not Tested | Not Tested |

---

**Table S2. Changes in Expression of Select Genes, Related to Figure 1**

| <b>KEY</b> |                 |  |                  |
|------------|-----------------|--|------------------|
|            | $Z > 4$         |  | $-2 < Z \leq -1$ |
|            | $3 < Z \leq 4$  |  | $-3 < Z \leq -2$ |
|            | $2 < Z \leq 3$  |  | $-4 < Z \leq -3$ |
|            | $1 < Z \leq 2$  |  | $Z \leq -4$      |
|            | $-1 < Z \leq 1$ |  |                  |

| <b>Gene name</b> | <b>AMB</b> | <b>MCZ</b> | <b>CIC</b> |
|------------------|------------|------------|------------|
| <i>ALD3</i>      | 2.63       | 4.48       | 2.26       |
| <i>TPS2</i>      | 2.55       | 2.94       | 2.57       |
| <i>TSL1</i>      | 2.48       | 3.05       | 2.74       |
| <i>ALD3</i>      | 2.42       | 2.63       | 2.26       |
| <i>RTC3</i>      | 2.29       | 2.56       | 2.14       |
| <i>PGM3</i>      | 2.19       | 2.5        | 2          |
| <i>TDH1</i>      | 2.15       | 2.38       | 2.15       |
| <i>TPS1</i>      | 2.13       | 2.38       | 2.44       |
| <i>DOA4</i>      | 2.12       | 2.35       | 1.77       |
| YGR127W          | 2.1        | 2.64       | 2.22       |
| <i>PYK2</i>      | 2.1        | 2.01       | 2          |
| <i>HSP104</i>    | 2.02       | 2.62       | 2.63       |
| <i>SDS24</i>     | 1.94       | 2.14       | 2.07       |
| <i>HSP82</i>     | 1.89       | 2.28       | 2.26       |
| <i>GUD1</i>      | 1.89       | 2.69       | 2.17       |
| <i>PMC1</i>      | 1.87       | 3.22       | 3.04       |
| <i>ZRG8</i>      | 1.84       | 2.81       | 2.11       |
| <i>YAK1</i>      | 1.81       | 2.51       | 2.37       |
| <i>CDC13</i>     | 1.8        | 2.51       | 2.34       |
| <i>SOL4</i>      | 1.8        | 2.33       | 2.37       |
| <i>HSP78</i>     | 1.8        | 1.9        | 2.12       |
| <i>GSY2</i>      | 1.8        | 2.02       | 2.09       |
| YOL166W-A        | 1.79       | 2.1        | 2.03       |
| <i>SSE2</i>      | 1.78       | 1.91       | 1.85       |
| <i>SIP5</i>      | 1.78       | 1.99       | 1.73       |
| <i>TPK2</i>      | 1.78       | 1.7        | 1.79       |
| <i>ATG29</i>     | 1.76       | 2.41       | 2.11       |

| <b>Gene name</b> | <b>AMB</b> | <b>MCZ</b> | <b>CIC</b> |
|------------------|------------|------------|------------|
| <i>GAD1</i>      | 1.74       | 2.28       | 2.47       |
| <i>SDP1</i>      | 1.74       | 2.06       | 2.08       |
| <i>HFD1</i>      | 1.72       | 2.16       | 1.99       |
| <i>YGR066C</i>   | 1.72       | 2.07       | 2.39       |
| <i>YOR352W</i>   | 1.7        | 2.35       | 2.56       |
| <i>BUD5</i>      | 1.69       | 2.54       | 1.75       |
| <i>PGM2</i>      | 1.68       | 2.16       | 2.38       |
| <i>PTK2</i>      | 1.68       | 2.4        | 2.41       |
| <i>TPK1</i>      | 1.67       | 2.07       | 2.24       |
| <i>UGA1</i>      | 1.66       | 2.01       | 1.9        |
| <i>VPS8</i>      | 1.66       | 2.34       | 2.48       |
| <i>YKL091C</i>   | 1.66       | 2.2        | 2.06       |
| <i>LPE10</i>     | 1.65       | 1.99       | 2.13       |
| <i>PDE1</i>      | 1.6        | 3.33       | 1.82       |
| <i>CIT1</i>      | 1.59       | 1.79       | 1.06       |
| <i>KGD1</i>      | 1.54       | 2.22       | 0.55       |
| <i>UGP1</i>      | 1.52       | 1.91       | 0.82       |
| <i>CYR1</i>      | 1.51       | 1.93       | 1.52       |
| <i>SDH1</i>      | 1.42       | 1.69       | -0.07      |
| <i>GPH1</i>      | 1.4        | 2.11       | 1.71       |
| <i>SDH2</i>      | 1.29       | 1.5        | -0.07      |
| <i>ALD2</i>      | 1.1        | 2.8        | 1.71       |
| <i>MDH1</i>      | 1.09       | 1.53       | 1.85       |
| <i>BCY1</i>      | 1.07       | 2.6        | 1.26       |
| <i>BMH2</i>      | 1.07       | 2.33       | 1.01       |
| <i>SRV2</i>      | 0.91       | 2.62       | 1.18       |
| <i>RAS2</i>      | 0.82       | 0.49       | 0.58       |
| <i>PDE2</i>      | -1.6       | -2.53      | -0.93      |
| <i>YIL096C</i>   | -1.65      | -2.12      | -1.82      |
| <i>YGR272C</i>   | -1.65      | -2.52      | -2.14      |
| <i>ENP2</i>      | -1.66      | -2.02      | -1.8       |
| <i>YDR161W</i>   | -1.68      | -1.92      | -1.67      |
| <i>NOP8</i>      | -1.69      | -2.17      | -1.78      |
| <i>UTP6</i>      | -1.69      | -2.35      | -2.04      |
| <i>UTP7</i>      | -1.7       | -2.21      | -1.89      |
| <i>SOF1</i>      | -1.71      | -2.05      | -1.67      |
| <i>KRI1</i>      | -1.72      | -2.56      | -1.71      |

| <b>Gene name</b> | <b>AMB</b> | <b>MCZ</b> | <b>CIC</b> |
|------------------|------------|------------|------------|
| <i>SSF1</i>      | -1.73      | -2.23      | -2.24      |
| <i>RPC31</i>     | -1.73      | -3.18      | -2.6       |
| <i>LTV1</i>      | -1.75      | -2.55      | -1.95      |
| <i>UTP30</i>     | -1.76      | -2.49      | -2.33      |
| <i>UTP11</i>     | -1.77      | -2.99      | -2.32      |
| <i>UTP5</i>      | -1.78      | -2.32      | -1.65      |
| <i>REX4</i>      | -1.78      | -2.26      | -2.32      |
| <i>ECM1</i>      | -1.78      | -2.46      | -2.05      |
| <i>RRP36</i>     | -1.8       | -2.82      | -2.23      |
| <i>MAK3</i>      | -1.8       | -2.26      | -2.37      |
| <i>CNS1</i>      | -1.8       | -2.5       | -2.15      |
| <i>RRT14</i>     | -1.8       | -3.04      | -2.26      |
| <i>RNT1</i>      | -1.81      | -2.73      | -2.53      |
| <i>UTP23</i>     | -1.82      | -2.4       | -2.11      |
| <i>EFG1</i>      | -1.82      | -2.54      | -2.22      |
| <i>RIM2</i>      | -1.83      | -2.07      | -1.76      |
| <i>SEN15</i>     | -1.83      | -2.93      | -2.5       |
| <i>DUS1</i>      | -1.85      | -2.14      | -2.23      |
| <i>MPP6</i>      | -1.85      | -2.77      | -2.25      |
| <i>RPC53</i>     | -1.85      | -2.43      | -2.15      |
| <i>NCS2</i>      | -1.85      | -3.52      | -3.1       |
| YNL050C          | -1.86      | -2.94      | -1.71      |
| <i>TMA23</i>     | -1.86      | -2.06      | -1.69      |
| <i>GCD14</i>     | -1.87      | -2.16      | -1.76      |
| <i>CGR1</i>      | -1.87      | -2.77      | -1.86      |
| <i>NOP16</i>     | -1.88      | -2.67      | -2.43      |
| <i>MPP10</i>     | -1.88      | -2.73      | -2.29      |
| <i>ALB1</i>      | -1.88      | -2.1       | -1.84      |
| <i>NOP15</i>     | -1.9       | -3.21      | -2.86      |
| <i>UTP9</i>      | -1.9       | -2.65      | -2.22      |
| <i>IMP3</i>      | -1.9       | -2.85      | -2.03      |
| <i>ESF2</i>      | -1.93      | -2.62      | -2.37      |
| YNL022C          | -1.96      | -3.06      | -2.66      |
| <i>SSF2</i>      | -1.97      | -2.09      | -1.9       |
| <i>MTC6</i>      | -1.98      | -2.57      | -2.39      |
| <i>DJP1</i>      | -1.99      | -2.09      | -1.84      |
| <i>FAL1</i>      | -1.99      | -2.44      | -2.02      |

| <b>Gene name</b> | <b>AMB</b> | <b>MCZ</b> | <b>CIC</b> |
|------------------|------------|------------|------------|
| <i>NOP53</i>     | -1.99      | -3.16      | -2.35      |
| <i>SAP185</i>    | -2.01      | -2.22      | -1.77      |
| <i>YBR141C</i>   | -2.02      | -2.39      | -2.06      |
| <i>RRP14</i>     | -2.02      | -2.65      | -2.31      |
| <i>HCA4</i>      | -2.04      | -2.44      | -2.36      |
| <i>NOB1</i>      | -2.06      | -3.07      | -2.21      |
| <i>KTII2</i>     | -2.08      | -2.7       | -2.09      |
| <i>TMA16</i>     | -2.08      | -2.56      | -2.2       |
| <i>YNL097C-A</i> | -2.09      | -1.96      | -1.91      |
| <i>DBP7</i>      | -2.1       | -2.19      | -1.95      |
| <i>NA</i>        | -2.19      | -2.33      | -2.31      |
| <i>RAS1</i>      | -2.19      | -3.62      | -1.47      |
| <i>RRP4</i>      | -2.2       | -3.65      | -2.15      |
| <i>NA</i>        | -2.22      | -2.43      | -2.06      |
| <i>PRM7</i>      | -2.26      | -2.42      | -2.44      |
| <i>RRP15</i>     | -2.27      | -2.89      | -2.5       |
| <i>REI1</i>      | -2.28      | -2.55      | -2.3       |
| <i>RRN11</i>     | -2.3       | -2.67      | -1.78      |
| <i>RRP17</i>     | -2.31      | -2.71      | -2.8       |
| <i>GFD2</i>      | -2.32      | -2.7       | -2.31      |
| <i>SPB4</i>      | -2.35      | -2.4       | -2.19      |
| <i>TPK3</i>      | -2.37      | -2.91      | -1.99      |
| <i>RKM3</i>      | -2.38      | -2.22      | -2.3       |
| <i>BUD22</i>     | -2.4       | -3.02      | -2.4       |
| <i>DBP8</i>      | -2.41      | -2.43      | -2.2       |
| <i>PPH3</i>      | -2.6       | -2.74      | -1.88      |
| <i>YBR271W</i>   | -2.66      | -2.68      | -2.39      |
| <i>RPC37</i>     | -2.68      | -2.61      | -1.86      |
| <i>BRL1</i>      | -3.11      | -2.63      | -1.69      |

**Table S3. DNA Damage Repair Deletion Strain List, Related to Figure 4**

A list of *C. albicans* DKCa strains used in this work. The following strains were obtained from the Kirkpatrick Lab (Legrand et al., 2007, 2008).

| <b>Strain Name</b> | <b>Relevant Genotype</b>    |
|--------------------|-----------------------------|
| <b>DKCa20</b>      | rad10::CdHIS1/rad10::CdARG4 |
| <b>DKCa33</b>      | msh2::CdHIS1/msh2::CdARG4   |
| <b>DKCa39</b>      | WT                          |
| <b>DKCa67</b>      | rad50::CdHIS1/rad50::CdARG4 |
| <b>DKCa96</b>      | rad52::CdHIS1/rad52::CdARG4 |
| <b>DKCa97</b>      | rad52::CdHIS1/rad52::CdARG4 |
